# Supplementary material
Source: MDPI journal article supplement (https://www.mdpi.com/2673-7655/3/1/6)
Supplement: s1 [file s1]

## Supplemental material

**Table S1.** The information of 38 varieties.

| Variety    | Cross parents                  | Regions of adaption                                   | Year of release |
|------------|--------------------------------|-------------------------------------------------------|-----------------|
| Jigu19     | Ai88×Qingfenggu                | Shanxi, Shandong, Henan,<br>Shaanxi                   | 2004            |
| 03-992     | Yugu2×Chengnong2               | Hebei, Liaoning, Neimongol,<br>Shanxi, Shaanxi, Gansu | 2010            |
| Ji0515     | 9024-6×Jigu25                  | Hebei, Shandong, Henan                                | 2010            |
| Yugu1      | Riben60/Tulong                 | Beijing, Tianjin, Hebei, Shanxi,<br>Neimongol         | 1984            |
| Chaogu15   | Tiegu7×Chaogu9                 | Hebei, Liaoning, Neimongol,<br>Shaanxi                | 2009            |
| Henggu10   | Zheng9188×Jigu15               | Hebei, Shandong, Henan                                | 2011            |
| Ji9050     | Zheng737qing×86-509            | Hebei, Shandong, Henan                                | 2002            |
| Jigu31     | Jigu19×Jigu25                  | Hebei, Shandong, Henan                                | 2017            |
| Baogu20    | 201094×528                     | Hebei, Shandong, Henan,<br>Liaoning                   | 2019            |
| Henggu11   | 201075×An2491                  | Hebei, Shandong, Henan,<br>Liaoning                   | 2018            |
| Yugu21     | Jigu19×SK325                   | Henan, Hebei, Shandong                                | 2013            |
| Heng201101 | Yugu18×M1                      | Hebei, jilin                                          | 2018            |
| Heng2015-1 | Jigu15                         | Hebei, jilin                                          | 2018            |
| Heng2015-2 | Henggu12×Henggu13              | Hebei                                                 | 2019            |
| Henggu13   | Yugu15×Jigu31                  | Hebei, Shandong, Henan,<br>Liaoning, Jilin            | 2018            |
| Heng1475   | (Henggu12×Yugu18)<br>×kn2009-2 | Hebei                                                 | 2019            |
| Heng2011-2 | Jigu17×Henggu15                | Hebei, jilin                                          | 2018            |
| Henggu16   | Shagu×K721-1                   | Hebei, jilin                                          | 2018            |

|              |                                            |                                                                                                      |           |
|--------------|--------------------------------------------|------------------------------------------------------------------------------------------------------|-----------|
| Henggu17     | Shagu×K720-3                               | Hebei, jilin                                                                                         | 2018      |
| Zhonggu8     | Jigu20×Q31                                 | not clear                                                                                            | not clear |
| Yugu18       | Yugu1×Bao282                               | Hebei, Shandong, Henan                                                                               | 2012      |
| Henggu2018-2 | Henggu11×<br>(Hengyan5×SR3522)             | Hebei                                                                                                | 2019      |
| Henggu2018-3 | (Hengyan5×SR3522)<br>×M1508                | Hebei                                                                                                | 2019      |
| Canggu9      | Heng968×K492                               | Hebei                                                                                                | 2018      |
| Jigu42       | An4585<br>×(Shi98622×1310 - 2)             | Hebei, Henan, Shandong,<br>Xinjiang, Liaoning, Jilin,<br>Neimongol, Shanxi, Shaanxi,<br>Heilongjiang | 2018      |
| Henggu2018-1 | Henggu11×Ji0506                            | Hebei                                                                                                | 2018      |
| Jigu39       | An09-8525×[An4585×(<br>Jigu24×2010-M1445)] | Hebei, Henan, Shandong, Shanxi,<br>Xinjiang, Beijing, Liaoning, Jilin                                | 2018      |
| Zhonggu2     | Yugu1×Ai88                                 | Beijing, Tianjin, Hebei, Shanxi,<br>Neimongol                                                        | 2015      |
| Zhonggu10    | Zhonggu2 ×<br>Chuang877                    | Beijing, Tianjin, Hebei, Shanxi,<br>Neimongol                                                        | 2020      |
| Jigu168      | Yugu18×1310-2                              | Hebei, Liaoning, Neimongol,<br>Shaanxi                                                               | 2020      |
| Jigu22       | Yugu9×Jigu25                               | Hebei, Shandong, Henan                                                                               | not clear |
| Daqitoubai   | landrace                                   | not clear                                                                                            | not clear |
| QisiqueZhang | landrace                                   | not clear                                                                                            | not clear |
| Gushanggu    | landrace                                   | not clear                                                                                            | not clear |
| 206085       | landrace                                   | not clear                                                                                            | not clear |
| K1174        | landrace                                   | not clear                                                                                            | not clear |
| K549         | landrace                                   | not clear                                                                                            | not clear |

|       |          |           |           |
|-------|----------|-----------|-----------|
| M1508 | landrace | not clear | not clear |
|-------|----------|-----------|-----------|

**Table S2.** The recorded dates of sowing, booting and harvest.

| Year | Sowing date | Booting date | Harvest date |
|------|-------------|--------------|--------------|
| 2011 | 20 June     | 5 August     | 27 September |
| 2012 | 21 June     | 5 August     | 29 September |
| 2013 | 23 June     | 6 August     | 30 September |
| 2014 | 19 June     | 3 August     | 25 September |
| 2015 | 21 June     | 4 August     | 27 September |
| 2017 | 19 June     | 5 August     | 25 September |
| 2018 | 18 June     | 3 August     | 23 September |
| 2019 | 16 June     | 4 August     | 25 September |
| 2020 | 23 June     | 6 August     | 29 September |

**Table S3.** The maximum, minimum, mean and coefficient of variation of thousand grain weight of different varieties in nine seasons.

| Treatment | Year | Maximum | Minimum | Mean  | Coefficient of Variation (%) |
|-----------|------|---------|---------|-------|------------------------------|
| WW        | 2011 | 3.22    | 2.66    | 2.854 | 7.95                         |
|           | 2012 | 2.93    | 2.40    | 2.62  | 8.51                         |
|           | 2013 | 2.87    | 2.66    | 2.794 | 3.49                         |
|           | 2014 | 2.92    | 2.69    | 2.82  | 3.21                         |
|           | 2015 | 2.93    | 2.67    | 2.84  | 3.82                         |
|           | 2017 | 2.79    | 2.49    | 2.62  | 4.04                         |
|           | 2018 | 2.77    | 2.32    | 2.51  | 7.33                         |
|           | 2019 | 3.11    | 2.90    | 2.79  | 10.65                        |
|           | 2020 | 3.15    | 2.83    | 2.99  | 4.52                         |
| WS        | 2011 | 3.21    | 2.56    | 2.81  | 8.94                         |
|           | 2012 | 2.88    | 2.37    | 2.55  | 8.96                         |
|           | 2013 | 2.68    | 2.39    | 2.58  | 4.42                         |
|           | 2014 | 2.89    | 2.35    | 2.68  | 6.60                         |
|           | 2015 | 2.92    | 2.64    | 2.79  | 4.26                         |
|           | 2017 | 2.68    | 2.48    | 2.55  | 2.94                         |
|           | 2018 | 2.75    | 2.25    | 2.46  | 7.96                         |
|           | 2019 | 2.52    | 2.36    | 2.62  | 10.36                        |
|           | 2020 | 3.11    | 2.81    | 2.96  | 4.67                         |

**Table S4.** The maximum, minimum, mean and coefficient of variation of abortive grain rate weight of different varieties in nine seasons.

| Treatment | Year | Maximum | Minimum | Mean  | Coefficient of Variation (%) |
|-----------|------|---------|---------|-------|------------------------------|
| WW        | 2011 | 18.53   | 5.22    | 14.22 | 39.02                        |
|           | 2012 | 20.79   | 13.07   | 15.32 | 23.94                        |
|           | 2013 | 23.10   | 17.54   | 20.03 | 11.19                        |
|           | 2014 | 27.23   | 14.61   | 22.77 | 19.02                        |
|           | 2015 | 19.84   | 15.48   | 17.65 | 8.75                         |
|           | 2017 | 28.26   | 18.40   | 23.14 | 14.45                        |
|           | 2018 | 24.90   | 15.59   | 19.43 | 17.12                        |
|           | 2019 | 13.09   | 11.19   | 11.93 | 8.51                         |
|           | 2020 | 13.09   | 11.53   | 12.48 | 5.44                         |
| WS        | 2011 | 23.34   | 12.45   | 17.31 | 22.65                        |
|           | 2012 | 18.76   | 13.63   | 16.00 | 15.92                        |
|           | 2013 | 23.44   | 8.77    | 19.03 | 31.31                        |
|           | 2014 | 36.15   | 10.99   | 18.86 | 47.21                        |
|           | 2015 | 21.56   | 16.67   | 18.65 | 9.78                         |
|           | 2017 | 29.63   | 20.84   | 24.24 | 14.03                        |
|           | 2018 | 20.42   | 15.40   | 17.32 | 11.02                        |
|           | 2019 | 19.01   | 15.40   | 16.75 | 11.74                        |
|           | 2020 | 11.67   | 9.35    | 10.60 | 9.18                         |

**Table S5.** The maximum, minimum, mean and coefficient of variation of harvest index of different varieties in nine seasons

| Treatment | Year | Maximum | Minimum | Mean | Coefficient of Variation (%) |
|-----------|------|---------|---------|------|------------------------------|
| WW        | 2011 | 0.58    | 0.45    | 0.54 | 9.78                         |
|           | 2012 | 0.52    | 0.43    | 0.47 | 7.99                         |
|           | 2013 | 0.62    | 0.46    | 0.54 | 12.07                        |
|           | 2014 | 0.57    | 0.43    | 0.49 | 9.41                         |
|           | 2015 | 0.44    | 0.42    | 0.43 | 1.94                         |
|           | 2017 | 0.54    | 0.48    | 0.52 | 4.30                         |
|           | 2018 | 0.48    | 0.38    | 0.44 | 8.65                         |
|           | 2019 | 0.50    | 0.46    | 0.48 | 4.31                         |
|           | 2020 | 0.55    | 0.53    | 0.54 | 1.51                         |
| WS        | 2011 | 0.53    | 0.44    | 0.49 | 8.29                         |
|           | 2012 | 0.65    | 0.45    | 0.53 | 17.14                        |
|           | 2013 | 0.53    | 0.41    | 0.49 | 9.89                         |
|           | 2014 | 0.49    | 0.35    | 0.41 | 14.63                        |
|           | 2015 | 0.54    | 0.46    | 0.49 | 6.00                         |
|           | 2017 | 0.52    | 0.45    | 0.48 | 5.43                         |
|           | 2018 | 0.50    | 0.40    | 0.45 | 8.21                         |
|           | 2019 | 0.45    | 0.34    | 0.40 | 14.10                        |
|           | 2020 | 0.56    | 0.45    | 0.50 | 10.89                        |

**Table S6.** The major meteorological factors during the nine seasons at different growing stages of foxtail millet

| Meteorological factors         | Year | Whole Stage | Vegetative Stage | Reproductive Stage |
|--------------------------------|------|-------------|------------------|--------------------|
| Accumulated temperature (°C)   | 2011 | 2449.90     | 1337.70          | 1112.20            |
|                                | 2012 | 2481.60     | 1345.00          | 1136.60            |
|                                | 2013 | 2581.40     | 1314.20          | 1267.20            |
|                                | 2014 | 2497.10     | 1326.35          | 1170.75            |
|                                | 2015 | 2502.95     | 1320.53          | 1182.43            |
|                                | 2017 | 2546.00     | 1350.00          | 1196.00            |
|                                | 2018 | 2603.40     | 1396.10          | 1207.30            |
|                                | 2019 | 2616.60     | 1408.40          | 1208.20            |
|                                | 2020 | 2541.00     | 1312.90          | 1228.10            |
| Minimum temperature (°C)       | 2011 | 21.16       | 22.91            | 19.34              |
|                                | 2012 | 21.17       | 23.18            | 19.17              |
|                                | 2013 | 22.41       | 23.10            | 21.64              |
|                                | 2014 | 20.82       | 22.46            | 19.23              |
|                                | 2015 | 20.95       | 22.39            | 19.53              |
|                                | 2017 | 21.46       | 22.77            | 20.20              |
|                                | 2018 | 22.30       | 23.92            | 20.69              |
|                                | 2019 | 22.06       | 23.70            | 20.41              |
|                                | 2020 | 21.60       | 22.16            | 21.03              |
| Maximum temperature (°C)       | 2011 | 29.68       | 32.20            | 27.10              |
|                                | 2012 | 30.31       | 32.23            | 28.30              |
|                                | 2013 | 31.17       | 31.49            | 30.85              |
|                                | 2014 | 30.24       | 31.67            | 28.88              |
|                                | 2015 | 30.59       | 31.85            | 29.37              |
|                                | 2017 | 31.40       | 32.90            | 29.94              |
|                                | 2018 | 31.70       | 33.81            | 29.66              |
|                                | 2019 | 32.04       | 34.50            | 29.58              |
|                                | 2020 | 31.07       | 31.80            | 30.34              |
| Diurnal temperature range (°C) | 2011 | 8.52        | 9.27             | 7.76               |
|                                | 2012 | 9.14        | 9.14             | 9.13               |
|                                | 2013 | 8.76        | 8.31             | 9.21               |
|                                | 2014 | 9.42        | 9.19             | 9.64               |
|                                | 2015 | 9.64        | 9.45             | 9.83               |
|                                | 2017 | 9.94        | 10.13            | 9.74               |
|                                | 2018 | 9.41        | 9.85             | 8.97               |
|                                | 2019 | 9.99        | 10.80            | 9.17               |
|                                | 2020 | 9.47        | 9.64             | 9.31               |
| Reference evaporation (mm)     | 2011 | 393.55      | 256.24           | 137.31             |
|                                | 2012 | 422.07      | 253.73           | 168.35             |

|                          |      |        |        |        |
|--------------------------|------|--------|--------|--------|
|                          | 2013 | 419.15 | 230.59 | 188.56 |
|                          | 2014 | 429.27 | 239.81 | 189.46 |
|                          | 2015 | 455.33 | 251.86 | 203.46 |
|                          | 2017 | 514.67 | 292.71 | 221.95 |
|                          | 2018 | 511.89 | 296.15 | 215.74 |
|                          | 2019 | 493.78 | 288.57 | 205.21 |
|                          | 2020 | 487.74 | 281.94 | 205.80 |
| Sunshine duration (hr/d) | 2011 | 4.66   | 6.48   | 2.84   |
|                          | 2012 | 5.81   | 6.64   | 4.97   |
|                          | 2013 | 4.92   | 5.08   | 4.76   |
|                          | 2014 | 6.29   | 6.52   | 6.056  |
|                          | 2015 | 6.53   | 6.40   | 6.66   |
|                          | 2017 | 7.47   | 7.08   | 7.87   |
|                          | 2018 | 6.67   | 7.33   | 6.02   |
|                          | 2019 | 6.43   | 6.92   | 5.93   |
|                          | 2020 | 7.46   | 8.50   | 6.43   |
| Relatively humidity (%)  | 2011 | 75.38  | 68.00  | 82.76  |
|                          | 2012 | 73.92  | 70.63  | 77.20  |
|                          | 2013 | 72.78  | 73.35  | 72.20  |
|                          | 2014 | 71.59  | 70.29  | 72.90  |
|                          | 2015 | 74.87  | 72.98  | 76.77  |
|                          | 2017 | 74.68  | 70.12  | 79.24  |
|                          | 2018 | 72.88  | 70.06  | 75.69  |
|                          | 2019 | 64.82  | 60.14  | 69.49  |
|                          | 2020 | 69.82  | 66.22  | 73.41  |

**Table S7.** Component matrix for the principal component axes under well-watered (WW) treatment.

| Meteorological factors | Principal Components |        |        |        |        |
|------------------------|----------------------|--------|--------|--------|--------|
|                        | 1                    | 2      | 3      | 4      | 5      |
| TGW                    | -0.002               | 0.019  | -0.223 | -0.216 | -0.058 |
| AGR                    | 0.033                | 0.012  | 0.048  | 0.248  | -0.034 |
| HI                     | -0.006               | 0.132  | -0.157 | -0.076 | 0.290  |
| AT-WhS                 | -0.027               | 0.128  | 0.070  | -0.003 | -0.037 |
| AT-VS                  | -0.026               | -0.039 | 0.200  | -0.037 | -0.052 |
| AT-RS                  | -0.014               | 0.187  | -0.062 | 0.023  | -0.008 |
| ET <sub>0</sub> -WhS   | 0.136                | 0.034  | 0.026  | 0.036  | 0.133  |
| ET <sub>0</sub> -VS    | 0.132                | 0.008  | 0.052  | -0.013 | 0.273  |
| ET <sub>0</sub> -RS    | 0.11                 | 0.051  | -0.004 | 0.073  | -0.028 |
| Shr-WhS                | 0.189                | -0.023 | -0.069 | 0.010  | 0.077  |

|          |        |        |        |        |        |
|----------|--------|--------|--------|--------|--------|
| Shr-VS   | 0.169  | -0.027 | -0.086 | -0.094 | 0.254  |
| Shr-RS   | 0.154  | -0.015 | -0.04  | 0.074  | -0.056 |
| RH-WhS   | 0.044  | -0.018 | 0.019  | 0.239  | 0.238  |
| RH-VS    | -0.002 | 0.029  | 0.004  | 0.256  | 0.029  |
| RH-RS    | 0.075  | -0.059 | 0.028  | 0.137  | 0.362  |
| DTR-WhS  | 0.122  | -0.068 | 0.005  | -0.034 | -0.161 |
| DTR-VS   | 0.097  | -0.075 | 0.057  | -0.109 | 0.010  |
| DTR-RS   | 0.085  | -0.024 | -0.056 | 0.069  | -0.269 |
| Tmin-WhS | -0.077 | 0.190  | 0.078  | 0.027  | 0.132  |
| Tmin-VS  | -0.108 | 0.030  | 0.232  | 0.033  | -0.030 |
| Tmin-RS  | -0.023 | 0.226  | -0.052 | 0.016  | 0.187  |
| Tmax-WhS | 0.020  | 0.101  | 0.063  | -0.001 | -0.003 |
| Tmax-VS  | 0.001  | -0.027 | 0.170  | -0.052 | -0.008 |
| Tmax-RS  | 0.029  | 0.164  | -0.072 | 0.050  | -0.001 |

TGW, though grain weight; AGR, abortive growth rate; HI, harvest index; AT, average temperature; ET<sub>0</sub>, the reference evapotranspiration; Shr, sunshine duration; RH, relative humidity; DTR, the diurnal temperature range; Tmin, daily minimum temperature; Tmax, daily maximum temperature; WhS, whole growth stage; VS, vegetative stage; RS, reproductive stage.

**Table S8.** Component matrix for the principal component axes under water-stress (WS) treatment.

| Meteorological factors | Principal Components |        |        |        |        |
|------------------------|----------------------|--------|--------|--------|--------|
|                        | 1                    | 2      | 3      | 4      | 5      |
| TGW                    | 0.006                | -0.106 | -0.009 | -0.277 | -0.041 |
| AGR                    | 0.077                | 0.025  | -0.074 | 0.32   | 0.018  |
| HI                     | 0.003                | 0.004  | 0.100  | -0.100 | 0.351  |
| AT-WhS                 | -0.018               | 0.045  | 0.130  | 0.029  | -0.029 |
| AT-VS                  | -0.030               | 0.180  | -0.041 | 0.063  | -0.031 |
| AT-RS                  | -0.001               | -0.079 | 0.190  | -0.011 | -0.012 |
| ET <sub>0</sub> -WhS   | 0.114                | 0.076  | 0.033  | -0.028 | 0.124  |
| ET <sub>0</sub> -VS    | 0.066                | 0.160  | 0.009  | -0.106 | 0.196  |
| ET <sub>0</sub> -RS    | 0.133                | -0.018 | 0.048  | 0.050  | 0.029  |
| Shr-WhS                | 0.172                | -0.008 | -0.026 | -0.073 | 0.072  |
| Shr-VS                 | 0.083                | 0.059  | -0.014 | -0.257 | 0.141  |
| Shr-RS                 | 0.186                | -0.049 | -0.027 | 0.064  | 0.01   |
| RH-WhS                 | 0.044                | 0.017  | -0.006 | 0.108  | 0.301  |

|          |        |        |        |        |        |
|----------|--------|--------|--------|--------|--------|
| RH-VS    | 0.046  | -0.077 | 0.048  | 0.172  | 0.171  |
| RH-RS    | 0.027  | 0.106  | -0.057 | 0.007  | 0.325  |
| DTR-WhS  | 0.153  | -0.003 | -0.085 | 0.044  | -0.105 |
| DTR-VS   | 0.072  | 0.117  | -0.093 | -0.051 | -0.037 |
| DTR-RS   | 0.163  | -0.138 | -0.031 | 0.128  | -0.125 |
| Tmin-WhS | -0.098 | 0.081  | 0.205  | -0.012 | 0.103  |
| Tmin-VS  | -0.101 | 0.175  | 0.045  | 0.112  | 0.029  |
| Tmin-RS  | -0.053 | -0.011 | 0.236  | -0.087 | 0.113  |
| Tmax-WhS | 0.023  | 0.06   | 0.103  | 0.019  | 0.011  |
| Tmax-VS  | -0.012 | 0.177  | -0.031 | 0.031  | -0.009 |
| Tmax-RS  | 0.047  | -0.084 | 0.168  | 0.002  | 0.02   |

---

TGW, though grain weight; AGR, abortive growth rate; HI, harvest index; AT, average temperature; ET<sub>0</sub>, the reference evapotranspiration; Shr, sunshine duration; RH, relative humidity; DTR, the diurnal temperature range; Tmin, daily minimum temperature; Tmax, daily maximum temperature; WhS, whole growth stage; VS, vegetative stage; RS, reproductive stage.
